# Supplementary material for: Increased Levels of Circulating Iron-Albumin Complexes in Peripheral Arterial Disease Patients
Source: MDPI journal article supplement (doi:10.3390/antiox12020503), 2023-02-16
Supplement: s1 [file s1]

## Supplementary Information

# Increased levels of circulating Iron-Albumin complexes in peripheral arterial disease patients

Elisabetta Schiano <sup>1</sup>, Enrico Cappello <sup>2</sup>, Domenico Cecere <sup>2</sup>, Francesco Pompeo <sup>2</sup>, Ettore Novellino <sup>3</sup>,  
Mariano Stornaiuolo <sup>1\*</sup> & Marcello Izzo <sup>4\*</sup>.

<sup>1</sup> Department of Pharmacy, University of Naples Federico II, Via Montesano 49, 80131 Naples, Italy

<sup>2</sup> IRCCS Neuromed, 86077 Pozzilli, Italy

<sup>3</sup> Department of Medicine and Surgery, Università Cattolica del Sacro Cuore, 00168 Rome, Italy

<sup>4</sup> MathTechMed-Department of Mathematics for Technology, Medicine and Biosciences Research Center, University of Ferrara, 44121 Ferrara, Italy

\* Correspondence: mariano.stornaiuolo@unina.it (M.S.); zzimcl@unife.it (M.I.)

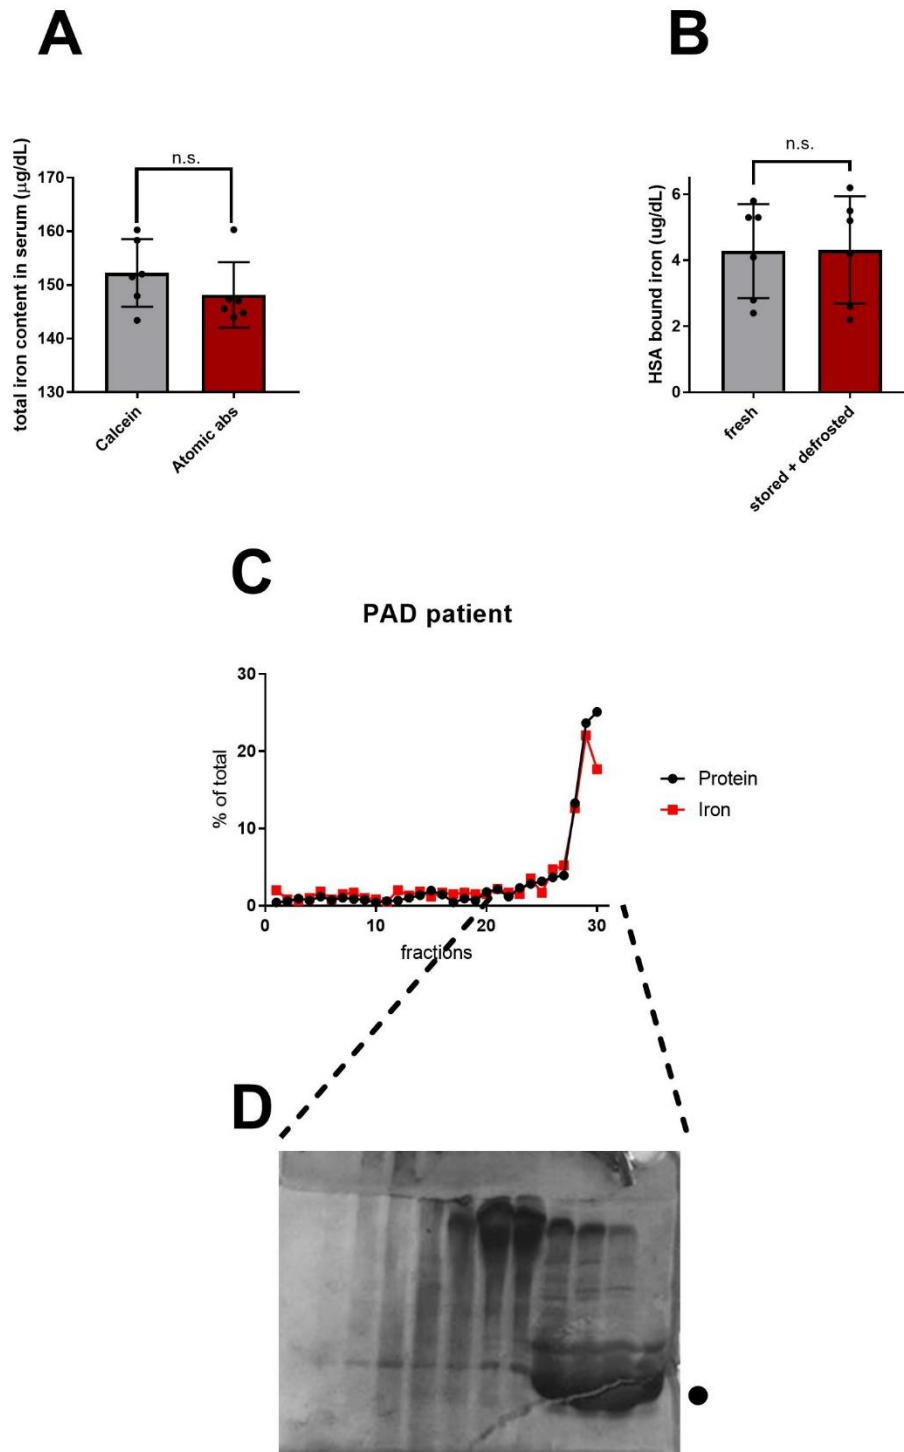

**Figure S1. Supplementary Methodological Information.** (A) Comparison between iron measurement by calcein (gray bar) and atomic absorbance spectroscopy (red bar) ( $n=6$ , n.s. non statistically different). Despite less sensitive (limit of detection of  $45.8 \mu\text{g/dL}$  and  $2 \text{ ppb}$  for calcein and atomic absorbance spectroscopy, respectively) calcein quenching directly correlates to total iron concentration. (B): Effect of freezing and defrosting on immunoisolation of NTBI-HSA complex. Amount of iron (calcein method) present in HSA immunoisolated from serum samples subjected (red bar) or not (gray bar) to freezing and defrosting ( $n=6$ , n.s. non statistically different). (C-D): Panels C and D show exemplificative results obtained for gel-filtration of serum from one of the PAD patients on Enrich SEC 70-75 HR 10/300 column. For each elution fraction, iron content (red squares, calcein method) and protein content (black dots, Bradford methods) are indicated. In panel D, Coomassie staining of non-reducing SDS-PAGE resolved elution fractions of sample shown in C ( • indicates HSA).
